# Supplementary material for: BI 2536 induces gasdermin E-dependent pyroptosis in ovarian cancer
Source: PubMed Central journal article supplement (PMC9396031; doi:10.3389/fonc.2022.963928), 2022-08-09
Supplement: DataSheet_2.pdf [file DataSheet_2.pdf]

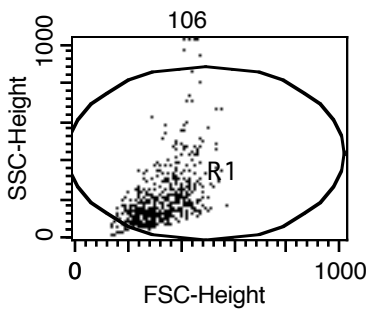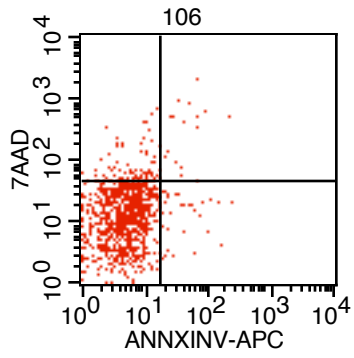

Sample ID: B1-0

| Quad | % Gated |
|------|---------|
| UL   | 7.47    |
| UR   | 1.98    |
| LL   | 87.57   |
| LR   | 2.98    |

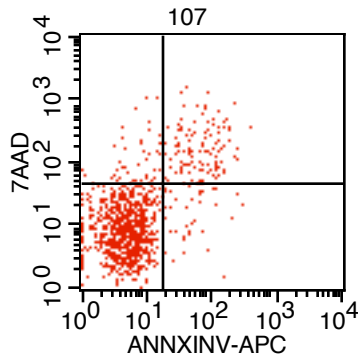

Sample ID: B1-1

| Quad | % Gated |
|------|---------|
| UL   | 4.58    |
| UR   | 12.52   |
| LL   | 78.43   |
| LR   | 4.47    |

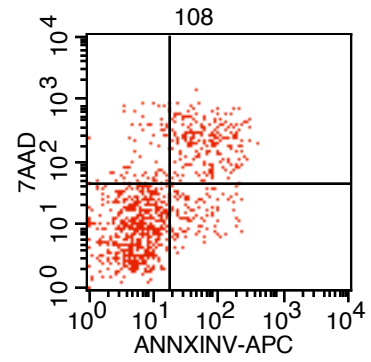

Sample ID: B1-2

| Quad | % Gated |
|------|---------|
| UL   | 7.21    |
| UR   | 22.79   |
| LL   | 59.49   |
| LR   | 10.51   |

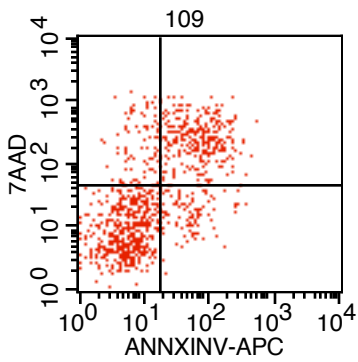

Sample ID: B1-4

| Quad | % Gated |
|------|---------|
| UL   | 8.87    |
| UR   | 29.51   |
| LL   | 51.13   |
| LR   | 10.48   |

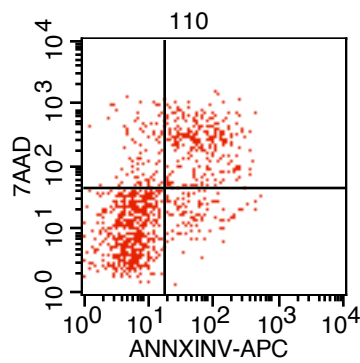

Sample ID: B1-5

| Quad | % Gated |
|------|---------|
| UL   | 9.59    |
| UR   | 28.64   |
| LL   | 52.59   |
| LR   | 9.18    |
